# Supplementary material
Source: Springer Nature journal article supplement (https://www.springermedizin.de/resource/supplementary/12933_2013_761_MOESM3_ESM.pdf/9539248)

### 3 : 1 Joinpoint

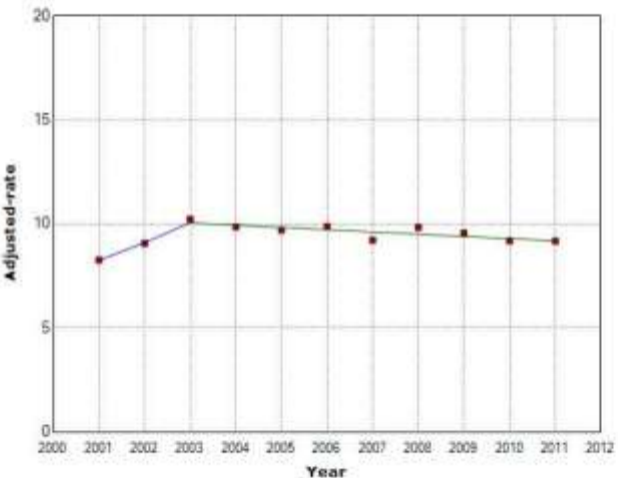

- Observed
- 2001-2003 APC = 10.46%
- 2003-2011 APC = -1.11%

Supplement: MOESM3 [file 9539248]
